# Supplementary material
Source: PubMed Central journal article supplement (PMC10332260)
Supplement: NIHMS1906207-supplement-Appendix_S1.pdf [file NIHMS1906207-supplement-Appendix_S1.pdf]

# Birth Includes Us content validation survey

Please complete the survey below.

Thank you!

## Dear Expert Reviewer:

**Thank you for taking the time to go through the Birthing Includes Us survey.**

**Please complete the following questions so that we can learn from your experience of participating, and help others to participate easily. We will consider all feedback and make changes as necessary to improve this online survey, or inform future studies.**

**This review is to make sure that the questions work well, how long it takes, and if the online tool is easy to use. We will analyze your answers to the mini survey about how it worked as a group of comments, without linking them to your names or other personal information.**

**We do not plan to analyze or report on information about your pregnancy that you may have provided, and that information will be deleted. If you would like to have your story and information included in the full study, you will need to fill out the final survey when it is available later in 2021.**

How long did it take to complete all sections of the survey?

- 10-15 minutes  
 16-30 minutes  
 31-45 minutes  
 46-60 minutes  
 61-75 minutes  
 76-90 minutes  
 over 90 minutes (1.5 hours)

I completed this survey on the following device:

- Mobile/cell phone  
 Computer  
 Both mobile and computer  
 iPad or tablet  
 Text reader  
 Other \_\_\_\_\_

How many sessions (blocks of time) did you need to complete the full survey?

- I finished it in one sitting (one block of time)  
 I needed 2 different blocks of time to complete the survey  
 I needed 3-4 different blocks of time to complete the survey  
 I needed to complete the survey in more than 4 sessions

If more than one session was necessary, I was easily able to return to the place I had stopped before.

- Yes  
 No

If no; please explain which issues you encountered

\_\_\_\_\_

I had technical difficulties completing the survey.

- Yes  
 No

---

Please let us know on which device (e.g. iPhone 8, Dell laptop) and on which browser (e.g. Chrome, Safari, Firefox) you completed the survey.

---

Please tell us which issues you encountered:

- Could not move to next page  
 Text box not working  
 Forward or back arrows not working  
 Too slow  
 Did not load full page  
 Hard to read on my device  
 Other \_\_\_\_\_
- 

Were there any questions that were unclear?

- Yes  
 No
- 

Please tell us which questions were unclear and how we might improve them? You can also use the feedback form to share this information.

---

Were the instructions before each section clear?

- Yes  
 No
- 

Were there any questions or topics related to respect in pregnancy and childbirth that you thought were important but missing in this survey?

- Yes  
 No
- 

If yes, Which questions were missing?

---

Were there any questions that brought back memories that were so difficult it made you want to stop the survey?

- Yes  
 No
- 

Would a link to available mental health resources help?

- Yes  
 No  
 Not sure
- 

Can you think of other resources or information that might help others who fill out the survey?

---

When it is ready, would you recommend this survey to a friend who had a pregnancy experience in the last 10 years?

- Yes  
 Maybe  
 No
- 

Please specify why not:

---

Our team is considering the option of collecting short stories (1-10 minutes) via a secure audio/video data collection app. If given this option, would you want to submit a story about your experience(s)?

- I would submit a story using audio  
 I would submit a story using audio or video  
 I need more information about this process before making a decision  
 I would not submit a story

---

Please explain why not:

---

---

Knowing the contents of the survey and how long it took you which of the following might encourage others to complete the survey?

- More information about how the study will help others
- You will be entered in a draw to win one of 5 Visa gift cards of \$500 value each
- You will be entered in a draw to win one of 2 Visa gift cards of \$1000 value each
- We will make a \$2500 donation on your behalf to one charity that most respondents choose.

---

What additional supports and/or incentives would people from your community need to complete this survey?

---

---

Any other comments?

---

---

Thank you very much for taking the time to review the Birth Includes Us survey and offering feedback. We will let you know when the survey launches in 2021.
