# Supplementary material
Source: PubMed Central journal article supplement (PMC10332260)
Supplement: NIHMS1906207-supplement-Appendix_S2.pdf [file NIHMS1906207-supplement-Appendix_S2.pdf]

## **Appendix S2 - Expert Reviewer Feedback Form**

Please use the tracking sheet below to make note of any survey items that are not relevant to your experience or not important to your community, with regards to accessing reproductive health services. Please also note when the wording of any questions is not clear and suggest improvements, if possible.

After going through the entire survey, please make note of any items that are missing (i.e., items that are relevant to your personal experience) and should be included in a survey about the experiences of LGBTQ+ people when receiving reproductive health services.

### **Please consider these areas when you go through the survey:**

- Do the questions resonate with your experience?
- Did the survey design and layout make it easy to participate?
- Did you have any problems navigating through the survey?
- Is the level of language used plain and simple to understand?
- Did you find the words and terms used inclusive and respectful?
- Can you think of questions or topics that are missing and that you would like to suggest?
- Finally, do you have suggestions to improve or edit any of the questions in the survey to minimize harm when recalling difficult, or sad memories? Did any question make you uncomfortable? If yes, are the resources we provide helpful?

### **Please follow the questions below to provide feedback on different sections of the survey:**

- Are the questions relevant to your personal experience?
- Are the questions important to your community?
- Is wording clear?
- Are any topics missing?

| Survey Item number | Relevant to your personal experience? | Important to your community? | Is wording clear?            | Comment and suggestions, to improve item? |
|--------------------|---------------------------------------|------------------------------|------------------------------|-------------------------------------------|
| EXAMPLE: A32       | Yes                                   | Yes, very important          | Please change this word: XXX | Need an additional response for XXX       |
|                    |                                       |                              |                              |                                           |
|                    |                                       |                              |                              |                                           |
|                    |                                       |                              |                              |                                           |
|                    |                                       |                              |                              |                                           |
|                    |                                       |                              |                              |                                           |
|                    |                                       |                              |                              |                                           |
|                    |                                       |                              |                              |                                           |
|                    |                                       |                              |                              |                                           |

Please add rows as needed.
